# Supplementary material for: Meta-Analysis of Neurochemical Changes Estimated via Magnetic Resonance Spectroscopy in Mild Cognitive Impairment and Alzheimer's Disease
Source: Frontiers journal article supplement (doi:10.3389/fnagi.2021.738971), 2021-10-22

**Supplementary Table 1** results of meta-analysis

| Region         | Subjects                    | Metabolites | No. of Studies | I <sup>2</sup> | H <sup>2</sup> | Z     | P    | SMD   | 95%CI         |
|----------------|-----------------------------|-------------|----------------|----------------|----------------|-------|------|-------|---------------|
| Hippocampus    | MCI Vs HC                   | mI          | 4              | 58.99%         | 2.44           | 1.08  | 0.28 | 0.23  | -0.19 to 0.65 |
|                |                             | Glx/Cr      | 3              | 86.62%         | 7.47           | -1.44 | 0.15 | -0.76 | -1.81 to 0.28 |
|                | AD Vs MCI                   | mI/Cr       | 4              | 29.18%         | 1.41           | 1.92  | 0.06 | 0.25  | -0.01 to 0.50 |
|                | MCI-converter Vs MCI-stable | Cho/Cr      | 2              | 0.00%          | 0.03           | -1.91 | 0.06 | -0.47 | -0.94 to 0.01 |
|                |                             | NAA/Cr      | 2              | 17.31%         | 1.21           | -0.72 | 0.47 | -0.17 | -0.65 to 0.30 |
| PC             | MCI Vs HC                   | mI/NAA      | 3              | 76.15%         | 4.19           | 0.04  | 0.97 | 0.02  | -0.79 to 0.82 |
|                |                             | Cho/Cr      | 17             | 89.01%         | 9.10           | 1.96  | 0.05 | 0.34  | -0.00 to 0.69 |
|                |                             | NAA/Cho     | 4              | 58.33%         | 2.40           | -1.80 | 0.07 | -0.35 | -0.72 to 0.03 |
|                | AD Vs HC                    | Cr          | 4              | 73.18%         | 3.73           | -1.71 | 0.09 | -0.37 | -0.80 to 0.05 |
|                |                             | Cho         | 6              | 50.97%         | 2.04           | 1.81  | 0.07 | 0.23  | -0.02 to 0.48 |
|                | AD Vs MCI                   | Cho/Cr      | 9              | 56.41%         | 2.29           | 0.79  | 0.43 | 0.10  | -0.15 to 0.35 |
|                |                             | mI          | 4              | 0.00%          | 0.37           | -0.69 | 0.49 | -0.07 | -0.28 to 0.13 |
|                |                             | Cho         | 3              | 76.46%         | 4.25           | -0.17 | 0.87 | -0.05 | -0.57 to 0.48 |
|                | MCI-converter Vs MCI-stable | NAA/Cr      | 2              | 0.00%          | 0.07           | 0.68  | 0.50 | 0.17  | -0.33 to 0.67 |
|                |                             | Cho/Cr      | 2              | 0.00%          | 0.64           | 0.44  | 0.66 | 0.11  | -0.39 to 0.61 |
| Temporal lobe  | MCI Vs HC                   | NAA/Cr      | 3              | 0.00%          | 0.30           | -0.81 | 0.42 | -0.12 | -0.40 to 0.17 |
|                | AD Vs HC                    | Cho/Cr      | 3              | 19.57%         | 1.24           | 1.91  | 0.06 | 0.35  | -0.01 to 0.71 |
|                |                             | mI/Cr       | 4              | 0.00%          | 0.50           | -1.87 | 0.06 | -0.27 | -0.57 to 0.01 |
| Parietal lobe  | MCI Vs HC                   | NAA/Cr      | 3              | 0.00%          | 0.41           | 0.16  | 0.88 | 0.02  | -0.2 to 0.24  |
|                | MCI-converter Vs MCI-stable | Cho/Cr      | 2              | 35.30%         | 1.55           | 0.82  | 0.41 | 0.15  | -0.21 to 0.50 |
|                |                             | NAA/mI      | 2              | 81.64%         | 5.45           | -0.18 | 0.85 | -0.08 | -0.92 to 0.76 |
| Occipital lobe | AD Vs HC                    | NAA/Cr      | 3              | 0.00%          | 0.47           | -1.69 | 0.09 | -0.22 | -0.47 to 0.04 |
|                |                             | Cho/Cr      | 3              | 54.88%         | 2.22           | 1.08  | 0.28 | 0.22  | -0.18 to 0.63 |

| Region                | Subjects                    | Metabolites | No. of Studies | I <sup>2</sup> | H <sup>2</sup> | Z     | P     | SMD   | 95%CI         |
|-----------------------|-----------------------------|-------------|----------------|----------------|----------------|-------|-------|-------|---------------|
| Occipital lobe        | AD Vs HC                    | Cho         | 3              | 43.21%         | 1.76           | -0.80 | 0.42  | -0.11 | -0.40 to 0.17 |
|                       |                             | Cr          | 3              | 28.62%         | 1.40           | -1.45 | 0.15  | -0.21 | -0.49 to 0.07 |
|                       |                             | mI          | 3              | 96.34%         | 27.29          | 1.09  | 0.28  | 1.09  | -0.87 to 3.05 |
|                       | MCI-converter Vs MCI-stable | NAA/Cr      | 3              | 83.86          | 6.20           | -1.93 | 0.05  | -0.98 | -1.98 to 0.02 |
|                       |                             | mI/Cr       | 2              | 0.00%          | 0.68           | -0.09 | 0.93  | -0.02 | -0.37 to 0.34 |
|                       |                             | NAA/mI      | 2              | 86.41%         | 7.36           | -0.87 | 0.38  | -0.44 | -1.44 to 0.56 |
| AC                    | MCI Vs HC                   | NAA/Cr      | 3              | 50.97%         | 2.04           | -0.80 | 0.42  | -0.20 | -0.68 to 0.29 |
|                       | AD Vs MCI                   | NAA/Cr      | 3              | 73.20%         | 3.73           | -1.10 | 0.45  | -0.25 | -0.88 to 0.39 |
| temporo-parietal lobe | AD Vs HC                    | NAA         | 3              | 32.36%         | 1.48           | -0.93 | 0.35  | -0.17 | -0.51 to 0.18 |
|                       |                             | Cho         | 3              | 88.49%         | 8.69           | 0.89  | 0.37  | 0.51  | -0.61 to 1.62 |
|                       |                             | Cr          | 3              | 0.00%          | 0.56           | -0.55 | 0.59  | -0.10 | -0.44 to 0.25 |
| Frontal WM            | AD Vs HC                    | mI          | 3              | 68.55%         | 3.18           | 1.80  | 0.07% | 0.64  | -0.06 to 1.34 |
|                       |                             | NAA         | 3              | 47.43%         | 1.90           | -0.80 | 0.42% | -0.15 | -0.50 to 0.21 |
| PWM                   | MCI Vs HC                   | Cho/Cr      | 3              | 0.00%          | 0.54           | -0.01 | 0.99% | 0.00  | -0.26 to 0.25 |

HC: healthy controls, AD: Alzheimer's disease, MCI: Mild Cognitive Impairment, SMD: standardized mean difference, PC: posterior cingulate cortex, PWM: paratrigonal white matter, AC: anterior cingulate cortex, WM: white matter, NAA: N-Acetyl Aspartate, mI: myo-inositol, Cho: Choline, Cr: Creatine, Glx: glutamate + glutamine.

**Supplementary Figure S1** Forest plots show the change of neurochemicals in hippocampus between MCI patients and HC subjects. **(A)** Data include 429 individuals from 7 studies for meta-analysis of Cho/Cr levels between MCI and HC. **(B)** Data include 465 individuals from 8 studies for meta-analysis ml/Cr levels between MCI and HC. **(C)** Data include 85 individuals from 3 studies for meta-analysis of ml/NAA levels between MCI and HC. **(D)** Data include 317 individuals from 4 studies for meta-analysis of NAA levels between MCI and HC. **(E)** Data include 317 individuals from 4 studies for meta-analysis of Cho levels between MCI and HC. **(F)** Data include 317 individuals from 4 studies for meta-analysis of Cr levels between MCI and HC.

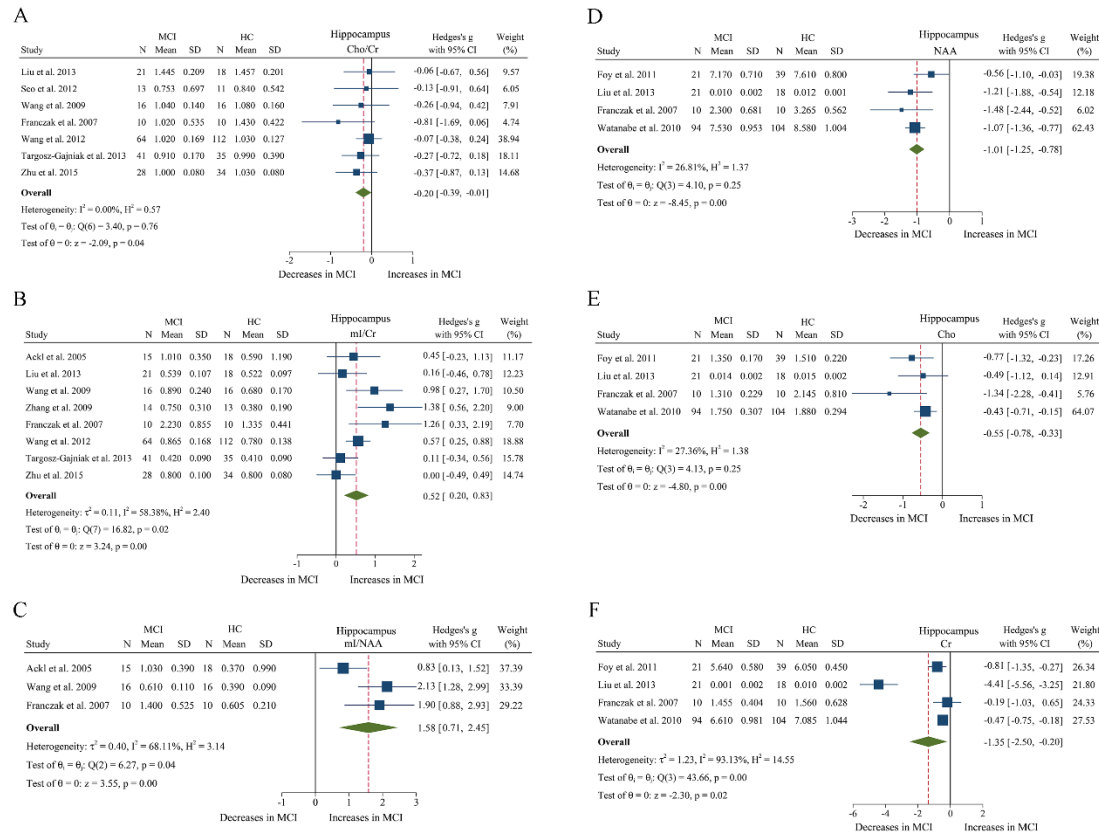

**Supplementary Figure S2** Forest plots show the change of neurochemicals in hippocampus between AD patients and HC subjects. **(A)** Data include 604 individuals from 4 studies for meta-analysis of Cho/Cr levels between AD and HC. **(B)** Data include 584 individuals from 5 studies for meta-analysis ml/Cr levels between AD and HC. **(C)** Data include 352 individuals from 3 studies for meta-analysis of ml/NAA levels between AD and HC. **(D)** Data include 829 individuals from 4 studies for meta-analysis of NAA levels between AD and HC. **(E)** Data include 609 individuals from 3 studies for meta-analysis of Cho levels between AD and HC. **(F)** Data include 609 individuals from 3 studies for meta-analysis of Cr levels between AD and HC.

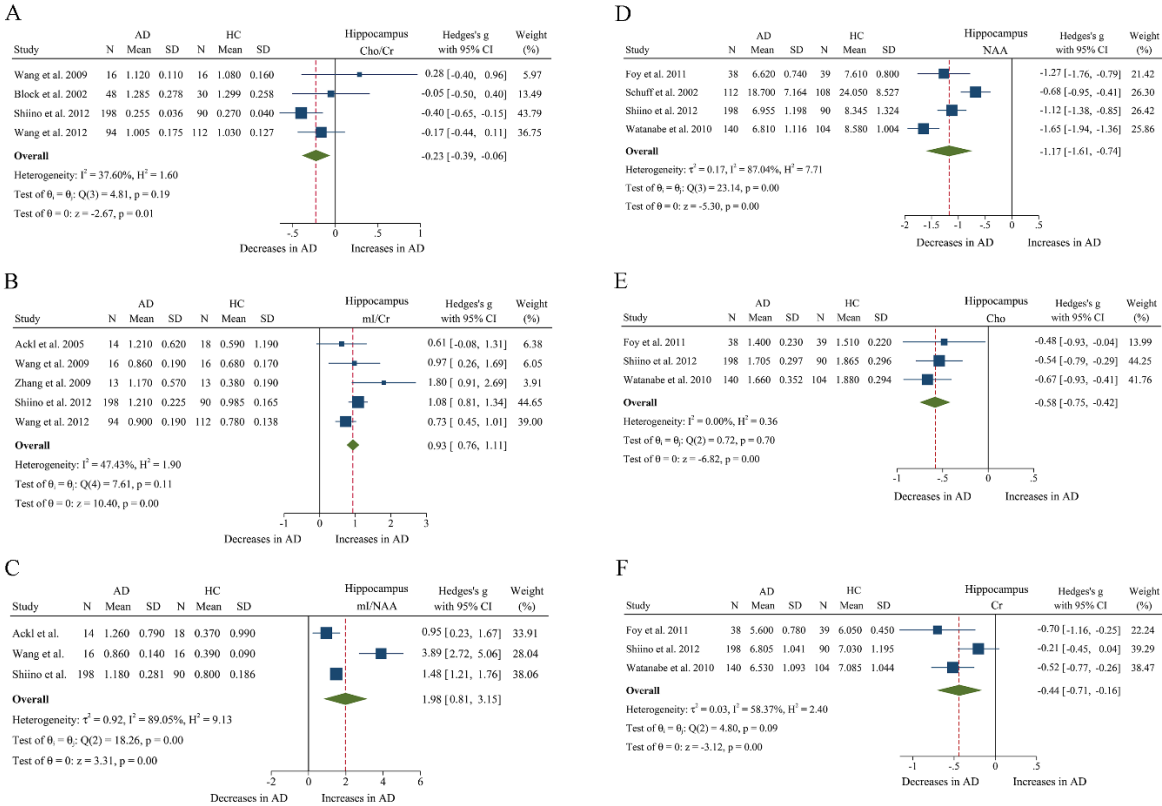

**Supplementary Figure S3** Forest plots show the changes of NAA/Cr and NAA in medial temporal lobe between AD patients and HC subjects. **(A)** Data include 333 individuals from 4 studies for meta-analysis of NAA/Cr levels between AD and HC. **(B)** Data include 509 individuals from 4 studies for meta-analysis NAA levels between AD and HC.

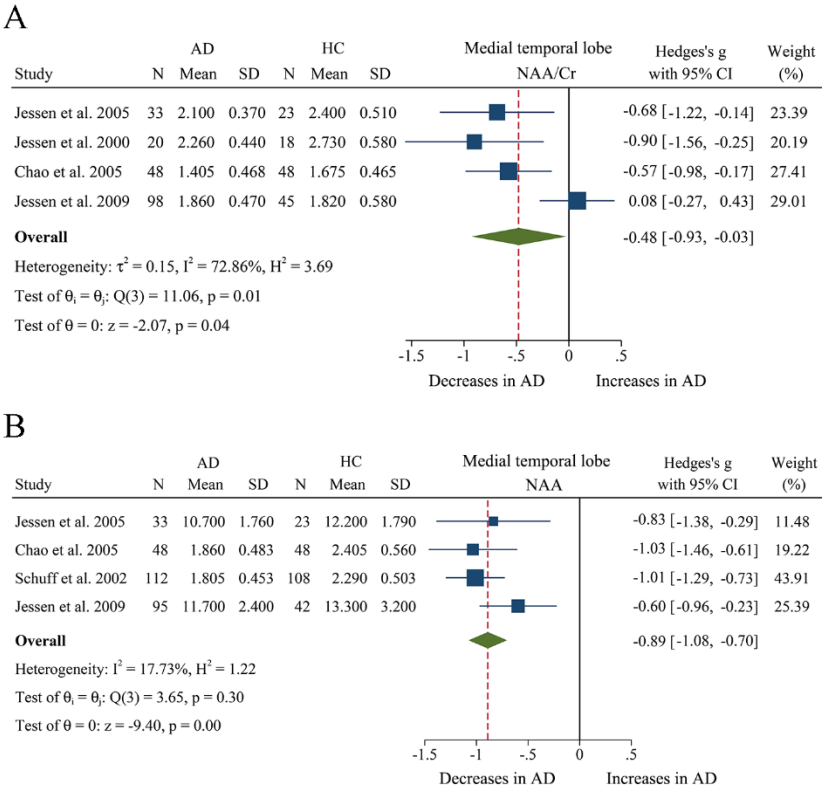

**Supplementary Figure S4** Forest plots show the change of neurochemicals in posterior cingulate and temporal lobe between MCI, AD patients and HC subjects. **(A)** Data include 279 individuals from 4 studies for meta-analysis of mI/NAA levels between AD and HC. **(B)** Data include 1159 individuals from 12 studies for meta-analysis Cho/Cr levels between AD and HC. **(C)** Data include 120 individuals from 3 studies for meta-analysis of mI/NAA levels between AD and MCI. **(D)** Data include 841 individuals from 9 studies for meta-analysis of mI levels between MCI and HC. **(E)** Data include 662 individuals from 6 studies for meta-analysis of mI levels between AD and HC. **(F)** Data include 267 individuals from 5 studies for meta-analysis of NAA/Cr levels in temporal lobe between AD and HC.

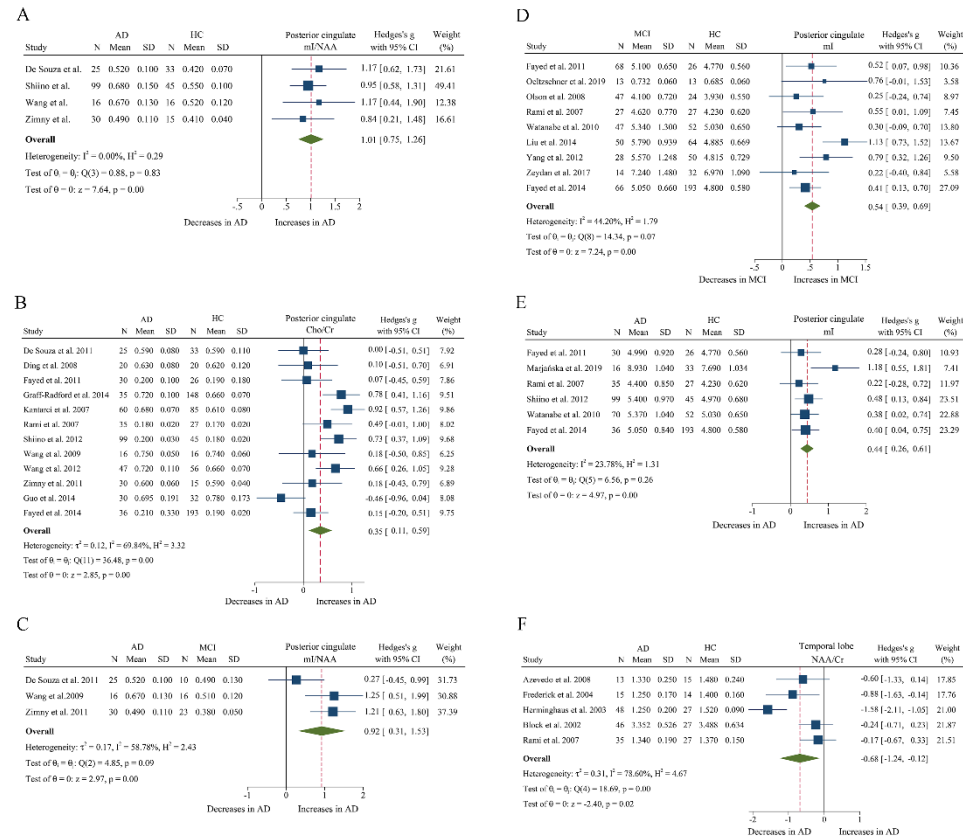

**Supplementary Figure S5** Forest plots show the change of NAA/Cr and NAA in parietal lobe between AD patients and HC subjects. **(A)** Data include 151 individuals from 3 studies for meta-analysis of NAA/Cr levels in the Parietal WM between AD and HC. **(B)** Data include 151 individuals from 3 studies for meta-analysis NAA/Cr levels in Parietal GM between AD and HC. **(C)** Data include 198 individuals from 3 studies for meta-analysis of NAA levels in the Parietal GM between AD and HC.

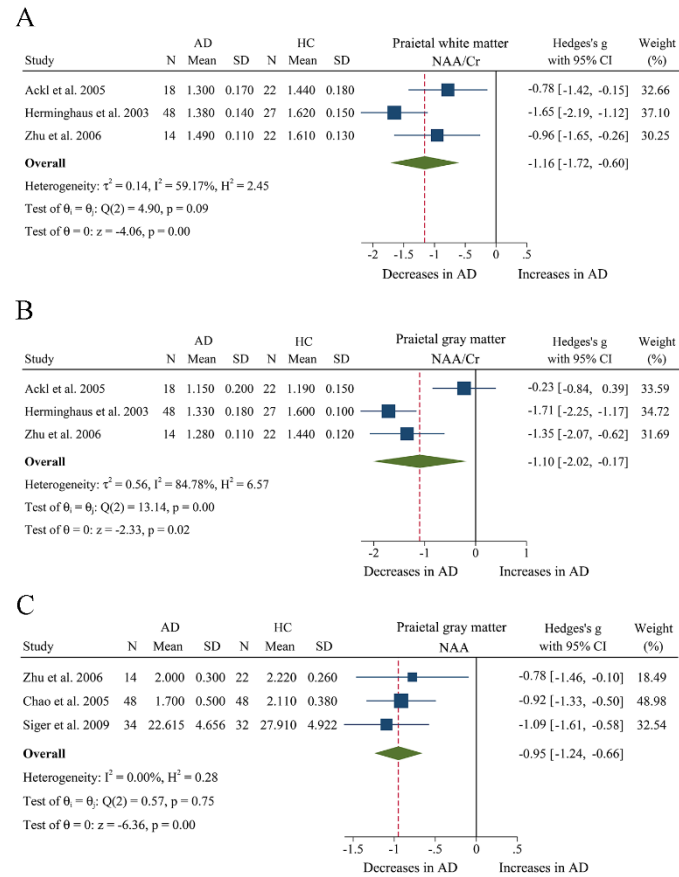

**Supplementary Figure S6** Forest plots show the change of NAA and NAA/Cr in occipital lobe, anterior cingulate, temporo-parietal lobe and frontal region between AD patients and HC subjects. **(A)** Data include 199 individuals from 3 studies for meta-analysis of NAA levels in occipital lobe between AD and HC. **(B)** Data include 136 individuals from 3 studies for meta-analysis NAA/Cr levels in the anterior cingulate between AD and HC. **(C)** Data include 151 individuals from 4 studies for meta-analysis of NAA/Cr levels in temporo-parietal lobe between AD and HC. **(D)** Data include 151 individuals from 4 studies for meta-analysis of mI/Cr levels in temporo-parietal lobe between AD and HC. **(E)** Data include 125 individuals from 3 studies for meta-analysis of mI levels in temporo-parietal lobe between AD and HC. **(F)** Data include 198 individuals from 3 studies for meta-analysis of NAA levels in frontal GM between AD and HC.

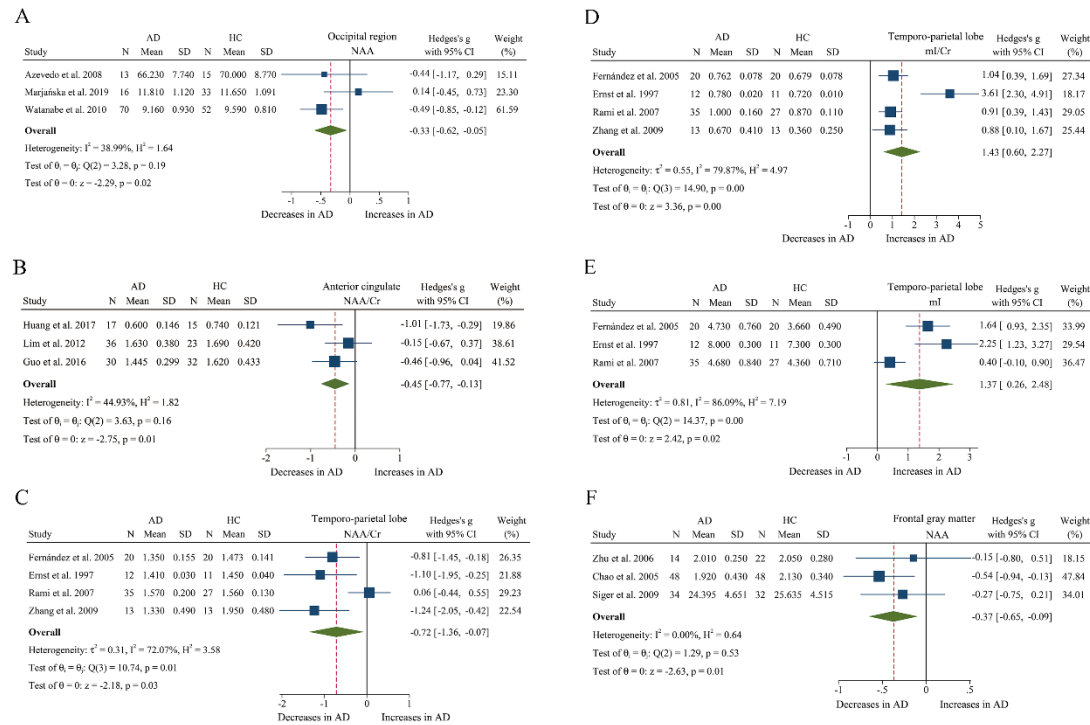



**Supplementary Figure S7** Forest plots show the change of NAA/Cr and ml/Cr in paratrigonal white matter lobe between MCI patients and HC subjects. **(A)** Data include 266 individuals from 3 studies for meta-analysis of NAA/Cr levels between MCI and HC. **(B)** Data include 266 individuals from 3 studies for meta-analysis ml/Cr levels in anterior cingulate cortex between AD and HC.

**A**

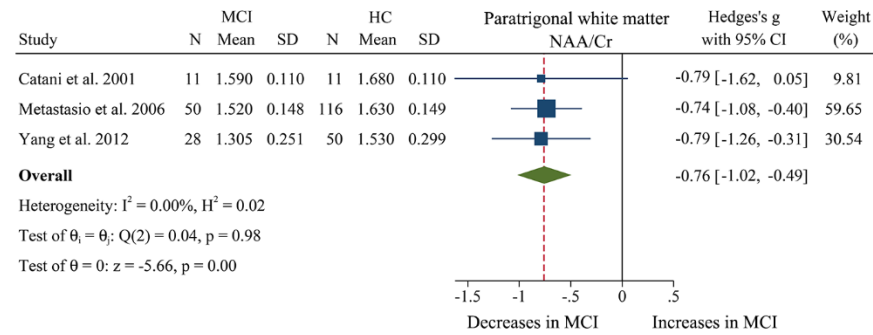

**B**

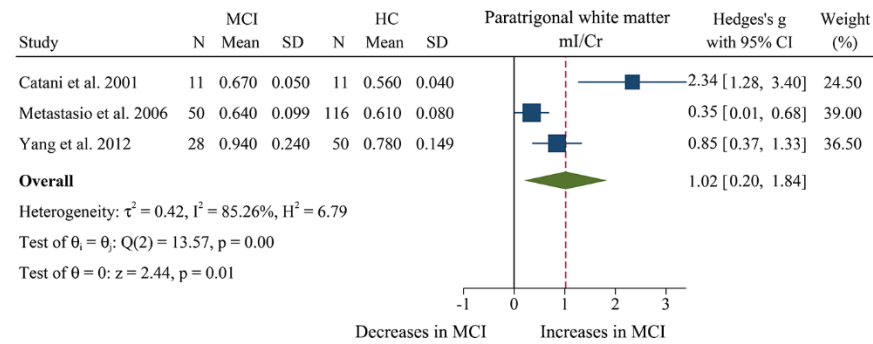

Supplement: Data_Sheet_1.pdf [file Data_Sheet_1.pdf]
